# Supplementary material for: Effect of Electrode Morphology on Performance of Ionic Actuators Based on Vat Photopolymerized Membranes
Source: Membranes (Basel). 2022 Nov 7;12(11):1110. doi: 10.3390/membranes12111110 (PMC9696670; doi:10.3390/membranes12111110)
Supplement: Supplementary file 1 [file membranes-12-01110-s001.zip › membranes-1975106-supplementary.pdf]

# **Supplementary Information for Effect of Electrode Morphology on Performance of Ionic Actuators Based on Vat Photopolymerized Membranes**

**Oleg S. Morozov \*, Anna V. Ivanchenko, Sergey S. Nechausov and Boris A. Bulgakov**

Department of Chemistry, Lomonosov Moscow State University, 119991 Moscow, Russia

\* Correspondence: osmorozov@yandex.ru

## **Table of contents**

|                                                                                                           |   |
|-----------------------------------------------------------------------------------------------------------|---|
| Figure S1. FTIR spectra for washed SWCNT/PVDF electrodes produced with different pore-forming agents..... | 2 |
| Figure S2. DSC curve for washed SWCNT/PVDF electrode made with PEG4000 .....                              | 2 |
| Figure S3. DSC curve for washed SWCNT/PVDF electrode made with DBP .....                                  | 3 |
| Figure S4. DSC curve for washed SWCNT/PVDF electrode made with BMIMBF <sub>4</sub> .....                  | 3 |
| Figure S5. Micrographs of electrodes and membranes connection .....                                       | 3 |
| Figure S6. Complex plane plots of impedance spectra of actuators .....                                    | 4 |
| Figure S7. Time dependence of current of the actuators under 3V during 5000 cycles at 0.4 Hz .....        | 4 |

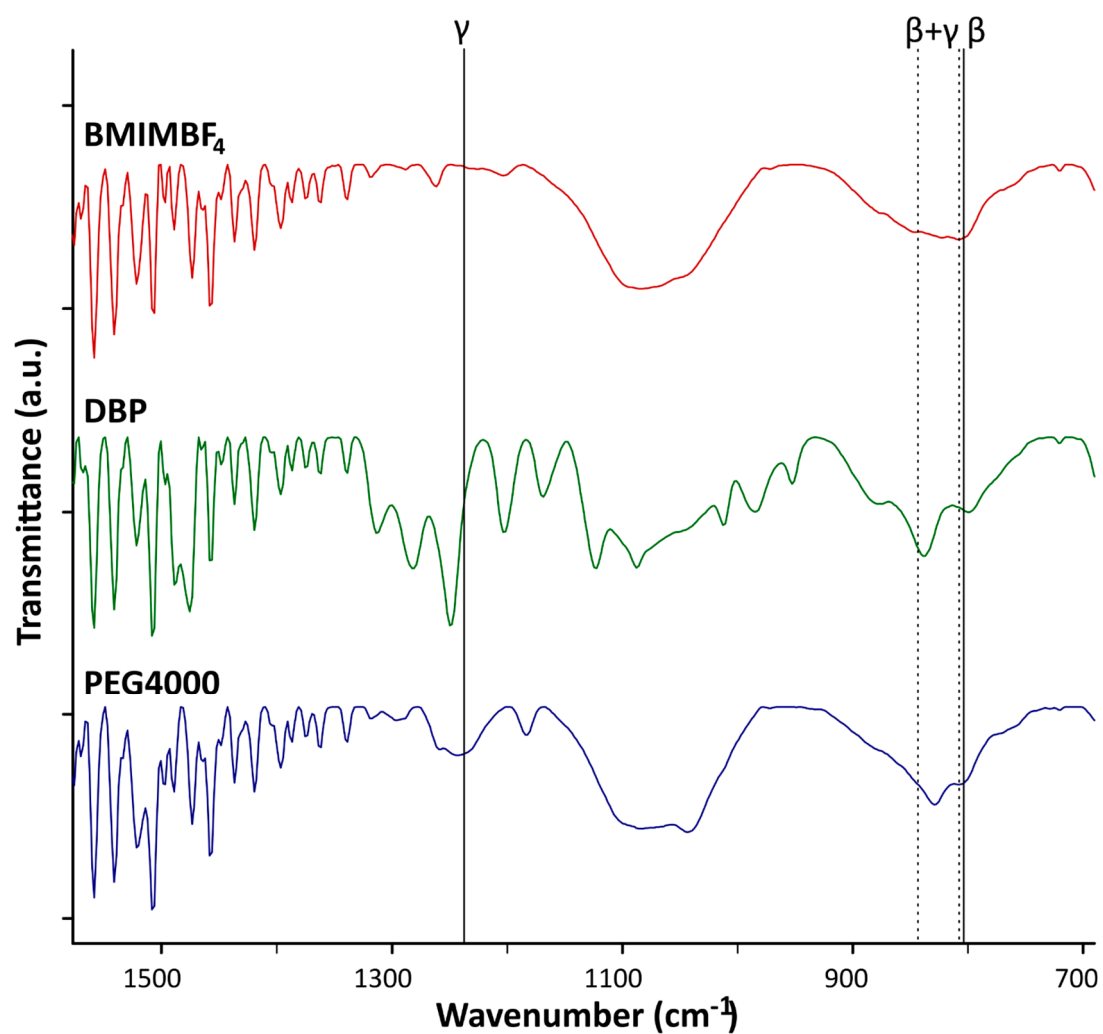

**Figure S1. FTIR spectra for washed SWCNT/PVDF electrodes produced with different pore-forming agents**

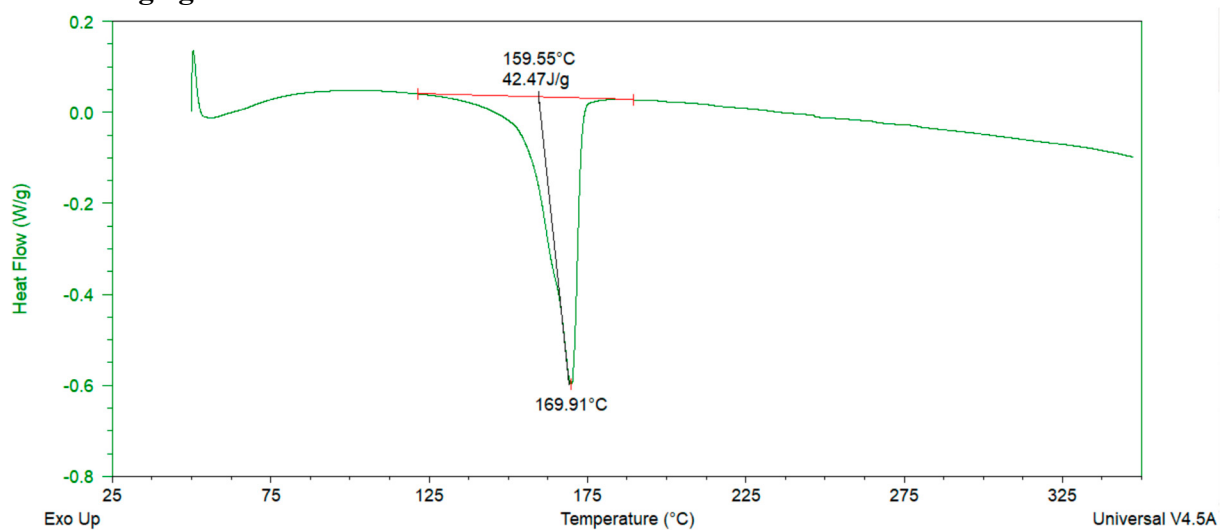

**Figure S2. DSC curve for washed SWCNT/PVDF electrode made with PEG4000**

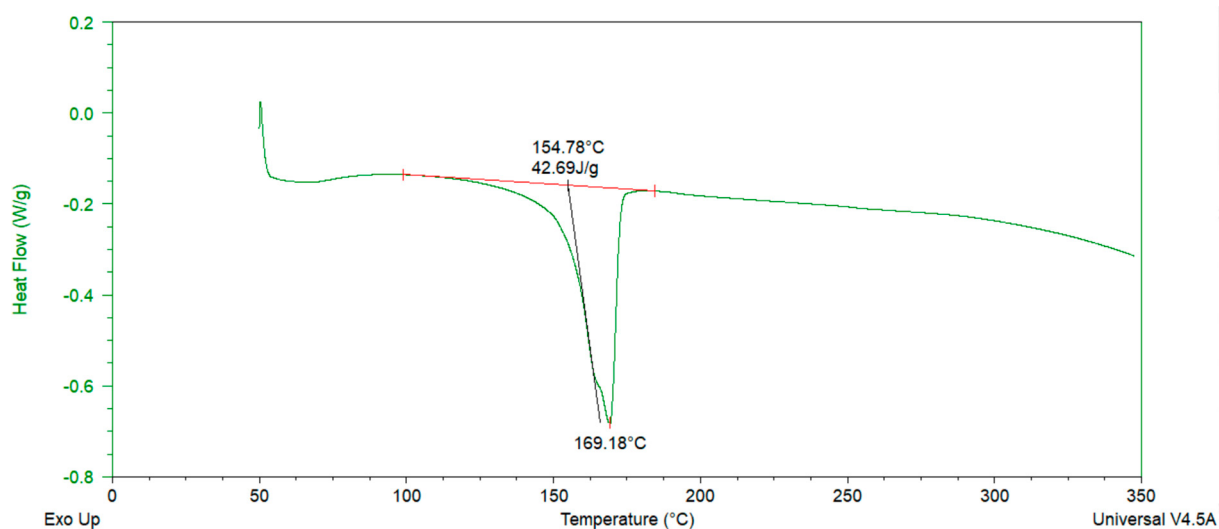

**Figure S3. DSC curve for washed SWCNT/PVDF electrode made with DBP**

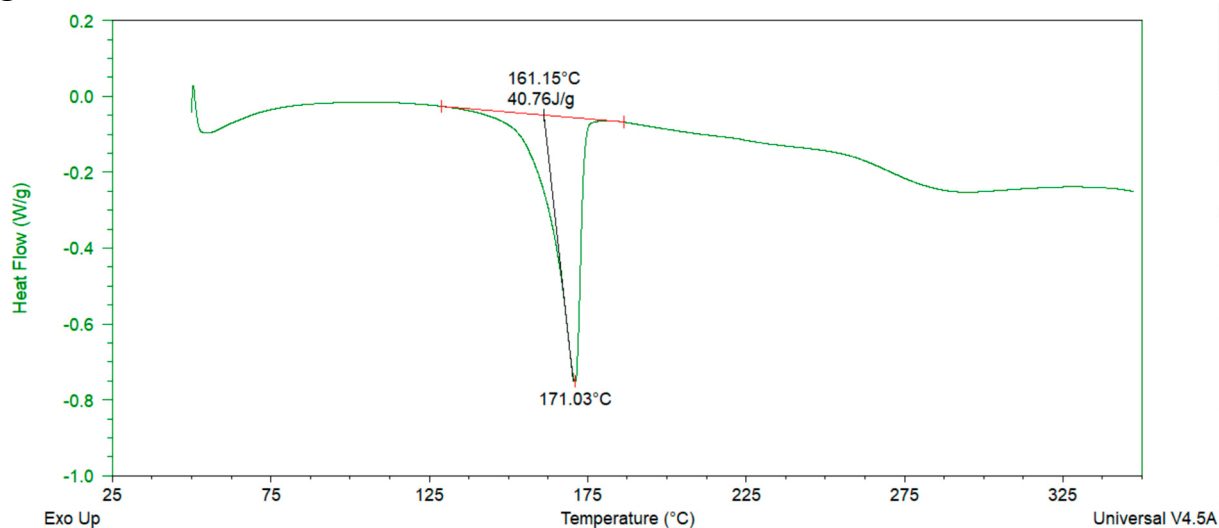

**Figure S4. DSC curve for washed SWCNT/PVDF electrode made with BMIMBF<sub>4</sub>**

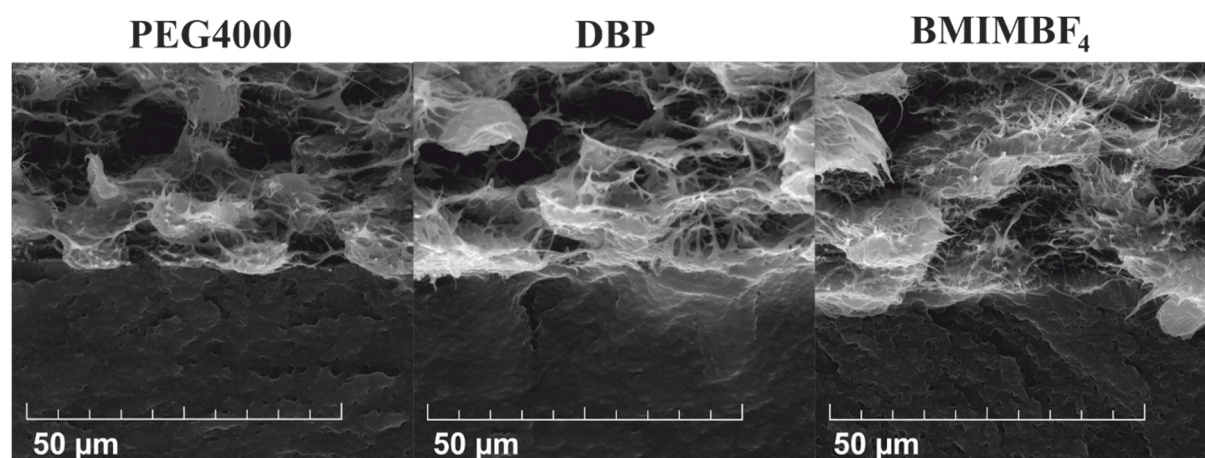

**Figure S5. Micrographs of electrodes and membranes connection**

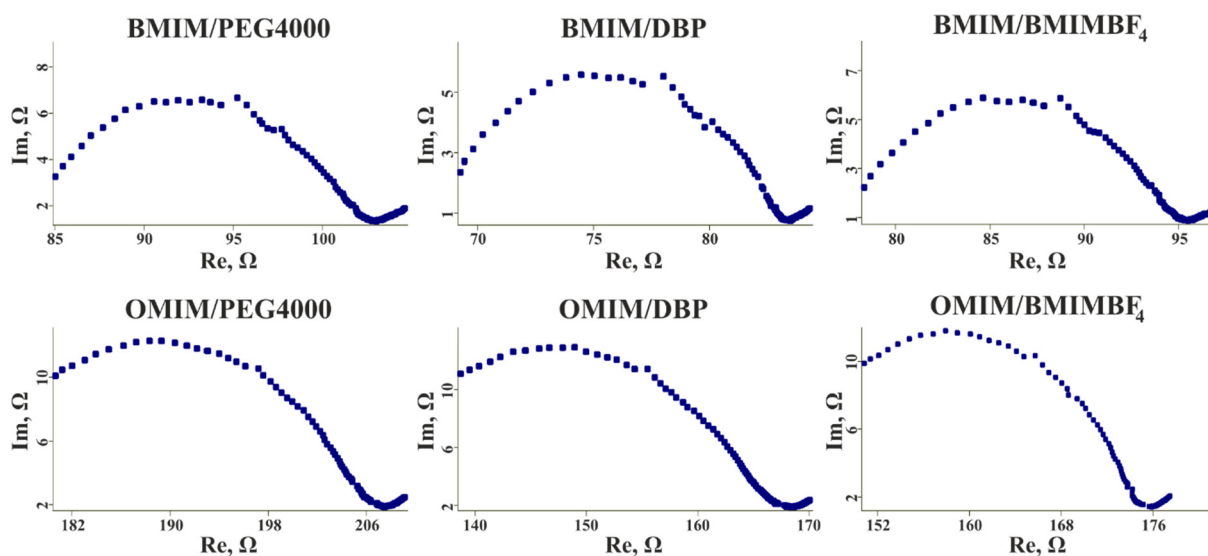

**Figure S6. Complex plane plots of impedance spectra of actuators**

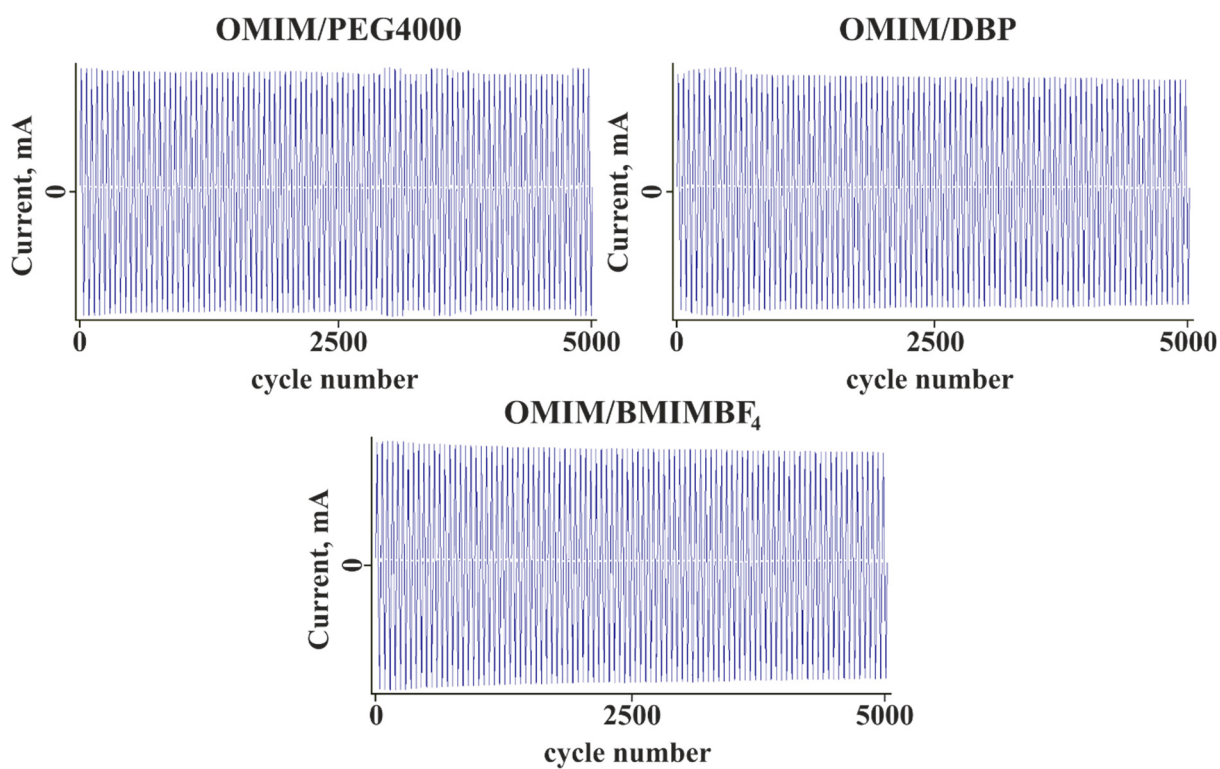

**Figure S7. Time dependence of current of the actuators under 3V during 5000 cycles at 0.4 Hz**
